# Supplementary material
Source: PubMed Central journal article supplement (PMC7611949)
Supplement: EMS128213-supplement-Appendix_1.pdf [file EMS128213-supplement-Appendix_1.pdf]

countries. However, we demonstrated that elements of the framework are relevant to India, a LMIC setting, allowing us to draw general conclusions. Unlike the many existing theoretical frameworks on public policy implementation, the proposed framework in this paper on the functioning of patient grievance systems takes into account both structure and agency. Furthermore, the model integrates the macro (e.g. discourses on patient rights) and micro policy implementation dynamics resulting from the power differentials between healthcare-seeking individuals and their collectives with the state and socially elite medical profession. The grievance redressal mechanisms for patient rights violations in health facilities showcase multilevel governance arrangements with multiple overlapping decision-making units at the national and subnational levels. With market perspectives pervading the health sector, there is an increasing trend to adopting a consumerist approach to protecting patient rights. In this line, avenues for grievance redressal for patient rights violations are gaining traction. The 'hegemonic power' and privileged position of medical professionals because of their financial, technical, political, bureaucratic and social resources in the multilevel governance arrangements for grievance redressal place the care-seeking individuals at a disadvantage during dispute-resolution processes. Inclusion of external structures in health services and the healthcare profession and involvement of laypersons in the grievance redressal processes are heavily contested. Normatively speaking, a patient grievance redressal system should be accessible, impartial and independent in its function, possess the required competence, have adequate authority, seek continuous quality improvement, offer feedback to the health system and be comprehensive and integrated within the larger healthcare regulatory architecture.

### Supplementary data

Supplementary data are available at *Health Policy and Planning* online.

### Data availability

The articles used in this review are available in the online supplementary material. The lawsuits from the SCI used in this review were retrieved from the source in the public domain.

### Funding

This work is supported by the PhD fellowship offered to MP by the Institute of Tropical Medicine, Antwerp, Directorate-general of Development Cooperation, Belgium. The time and the contributions of PNS for this project are supported by the DBT/Wellcome Trust India Alliance Intermediate Clinical and Public Health Research Fellowship awarded to him [IA/CPHI/16/1/502648].

### Acknowledgements

We would like to thank Kranthi Vysyaraju, Swathi S.B., Mahesh Kadammanavar and Yogish C.B. for their engagement in the validation of the framework. We thank the

reviewers of HPP for the useful feedback, which helped to improve the quality of the manuscript.

### Ethical approval

Ethical approval was not required since it is a review paper that uses already published literature and court cases from the Supreme Court of India, which are available in the public domain.

### Conflict of interest statement

The authors declare that they have no conflict of interest.

### Appendix 1. Cases

1. AMRI V. Dr Kunal Saha and others. 2013. SCI
2. A.S. Mittal and Om Prakash Tapar V. State of Uttar Pradesh and others. 1989. SCI
3. Dr. Balram Prasad V. Kunal Saha. 2013. SCI
4. Indian Medical Association V. VP Shantha and others. 1995. SCI
5. Jacob Mathew V. State of Punjab and Anr. 2005. SCI
6. Kusum Sharma and Others V. Batra Hospital & Medical Research. 2010. SCI
7. Maharaja Agrasen Hospital and others V. Master Rishabh Sharma. 2009. SCI
8. Malay Kumar Ganguly V. Sukumar Mukherjee and others. 2009. SCI
9. Martin F. D Souza V. Mohd Ishfaq. 2009. SCI
10. Mr X V. Hospital X. 1995. SCI
11. Pankaj Sinha V. Union of India and others. 2008. SCI
12. P.B. Desai V. State of Maharashtra. 2019. SCI
13. Paschim Banga Khet Mazdoorsamity V. State of West Bengal. 1996. SCI
14. State of Haryana and others V. Smt. Santra. 2000. SCI
15. State of Punjab V. Shiv Ram and others. 2005. SCI
16. State of Maharashtra V. Dr. Praful B Desai. 2003. SCI
17. Samira Kohli V. Dr. Prabha Machanda and others. 2008. SCI

### References

- Acharya S. 2007. *Health Care Utilization among Dalit Children - Understanding Social Discrimination and Exclusion: A Study in Selected Villages of Gujarat and Rajasthan*. New Delhi: UNICEF-IIDS Study, Indian Institute of Dalit Studies.
- Annandale E, Hunt K. 1998. Accounts of disagreements with doctors. *Social Science & Medicine* 46: 119–29.
- Annas JG. 1998. A national bill of patient rights. *New England Journal of Medicine* 338: 695–9.
- Beaupert F, Carney T, Chiarella M *et al.* 2014. Regulating healthcare complaints: a literature review. *International Journal of Health Care Quality Assurance* 27: 505–18.
- Bhate DP, Khatri R, Wagle S. 2011. Poor standards of care in small, private hospitals in Maharashtra, India: implications for public-private partnerships for maternity care. *Reproductive Health Matters* 19: 32–41.
- Bismark MM, Brennan TA, Paterson RJ *et al.* 2006. Relationship between complaints and quality of care in New Zealand: a descriptive analysis of complainants and non-complainants following adverse events. *Quality & Safety in Health Care* 15: 17–22.
